# Supplementary material for: Record Linkage for Malaria Deaths Data Recovery and Surveillance in Brazil
Source: MDPI journal article supplement (doi:10.3390/tropicalmed8120519), 2023-12-14
Supplement: s1 [file s1]

SUPPLEMENTARY FILE SII

Supplementary Table S1. Retrieval of “ignored” or “blank” data for the education level variable (in years of study) in SIM.

|                                               |            | Education level in years of study<br>(Sivep-Malaria and Sinan) |                    |                    |                     |                     |                     |                            |                   |
|-----------------------------------------------|------------|----------------------------------------------------------------|--------------------|--------------------|---------------------|---------------------|---------------------|----------------------------|-------------------|
|                                               |            | Illiterate<br>(N = 20)                                         | 1 to 3<br>(N = 26) | 4 to 7<br>(N = 37) | 8 to 11<br>(N = 39) | Over 11<br>(N = 26) | Ignored<br>(N = 32) | Not applicable<br>(N = 19) | Blank<br>(N = 17) |
| Education level<br>in years of study<br>(SIM) | Illiterate | 8                                                              | 4                  | 3                  | 0                   | 0                   | 1                   | 1                          | 1                 |
|                                               | 1 to 3     | 1                                                              | 5                  | 7                  | 6                   | 0                   | 2                   | 1                          | 2                 |
|                                               | 4 to 7     | 2                                                              | 6                  | 10                 | 9                   | 0                   | 2                   | 0                          | 3                 |
|                                               | 8 to 11    | 1                                                              | 3                  | 7                  | 13                  | 5                   | 10                  | 0                          | 5                 |
|                                               | Over 11    | 2                                                              | 0                  | 2                  | 7                   | 20                  | 9                   | 0                          | 2                 |
|                                               | Ignored    | 2                                                              | 4                  | 7                  | 3                   | 0                   | 3                   | 0                          | 0                 |
|                                               | Blank      | 4                                                              | 4                  | 1                  | 1                   | 1                   | 5                   | 17                         | 4                 |

Supplementary Table S2. Recovery of “ignored” or “blank” data for the Race/color variable in SIM.

|                  |            | Race/color (Sivep-Malária e Sinan) |                 |                |                     |                 |               |
|------------------|------------|------------------------------------|-----------------|----------------|---------------------|-----------------|---------------|
|                  |            | White (N = 50)                     | Black (N = 124) | Yellow (N = 2) | Indigenous (N = 29) | Ignored (N = 8) | Blank (N = 3) |
| Race/color (SIM) | White      | 42                                 | 6               | 1              | 0                   | 3               | 1             |
|                  | Black      | 1                                  | 12              | 0              | 0                   | 0               | 1             |
|                  | Brown      | 5                                  | 103             | 1              | 0                   | 3               | 0             |
|                  | Indigenous | 0                                  | 0               | 0              | 29                  | 0               | 0             |
|                  | Blank      | 2                                  | 3               | 0              | 0                   | 2               | 1             |
|                  |            |                                    |                 |                |                     |                 |               |

Supplementary Table S3. Recovery of “ignored” or “blank” data for the Occupation variable in SIM.

|                                         |                                | Occupation<br>(SIM) |                  |
|-----------------------------------------|--------------------------------|---------------------|------------------|
|                                         |                                | Blank (N = 68)      | Filled (N = 148) |
| Occupation<br>(Sivep-Malária and Sinan) | Agriculture                    | 7                   | 22               |
|                                         | Hunting/fishing                | 2                   | 4                |
|                                         | Construction of roads and dams | 0                   | 2                |
|                                         | Domestic                       | 11                  | 20               |
|                                         | Plant exploration              | 1                   | 0                |
|                                         | Gold Mining                    | 0                   | 8                |
|                                         | Mining                         | 0                   | 3                |
|                                         | Driver                         | 0                   | 3                |
|                                         | Livestock                      | 0                   | 2                |
|                                         | Tourism                        | 1                   | 7                |
|                                         | Traveler                       | 9                   | 21               |
|                                         | Ignored                        | 37                  | 56               |
|                                         |                                |                     |                  |

Supplementary Table S4. Percentage of matching deaths among people with the underlying cause of death as “Malaria as an associated cause” according to age group in years.

| Age range of deaths by<br>"Malaria as an associated cause" | NOT-PAIRED | %      | PAIRED | %      | Total | %      |
|------------------------------------------------------------|------------|--------|--------|--------|-------|--------|
| 01 - 10                                                    | 1          | 2,86%  | 1      | 11,11% | 2     | 4,55%  |
| 11 - 20                                                    | 2          | 5,71%  | -      | -      | 2     | 4,55%  |
| 21 - 30                                                    | -          | -      | 2      | 22,22% | 2     | 4,55%  |
| 31 - 40                                                    | 5          | 14,29% | 2      | 22,22% | 7     | 15,91% |
| 41 - 50                                                    | 3          | 8,57%  | 1      | 11,11% | 4     | 9,09%  |
| 51 - 60                                                    | 2          | 5,71%  | 1      | 11,11% | 3     | 6,82%  |
| 61 - 70                                                    | 6          | 17,14% | 1      | 11,11% | 7     | 15,91% |
| 71 - 80                                                    | 14         | 40,00% | -      | -      | 14    | 31,82% |
| Over 80                                                    | 2          | 5,71%  | 1      | 11,11% | 3     | 6,82%  |

|              |           |                |          |                |           |                |
|--------------|-----------|----------------|----------|----------------|-----------|----------------|
| <b>Total</b> | <b>35</b> | <b>100,00%</b> | <b>9</b> | <b>100,00%</b> | <b>44</b> | <b>100,00%</b> |
|--------------|-----------|----------------|----------|----------------|-----------|----------------|

Supplementary Table S5. Percentage of matching deaths of people between 31 and 40 years old according to level of education in years of study.

| Education of deaths<br>between 31 and 40 years of age | NOT-PAIRED | %              | PAIRED    | %              | Total     | %              |
|-------------------------------------------------------|------------|----------------|-----------|----------------|-----------|----------------|
| Illiterate                                            | 3          | 12,50%         | 2         | 4,35%          | 5         | 7,14%          |
| 1 - 3                                                 | 2          | 8,33%          | 6         | 13,04%         | 8         | 11,43%         |
| 4 - 7                                                 | 3          | 12,50%         | 4         | 8,70%          | 7         | 10,00%         |
| 8 - 11                                                | 7          | 29,17%         | 10        | 21,74%         | 17        | 24,29%         |
| Over 11                                               | 4          | 16,67%         | 15        | 32,61%         | 19        | 27,14%         |
| Ignored                                               | 3          | 12,50%         | 4         | 8,70%          | 7         | 10,00%         |
| Blank                                                 | 2          | 8,33%          | 5         | 10,87%         | 7         | 10,00%         |
| <b>Total</b>                                          | <b>24</b>  | <b>100,00%</b> | <b>46</b> | <b>100,00%</b> | <b>70</b> | <b>100,00%</b> |

Supplementary Table S6. Percentage of matching deaths of people over 71 years of age according to level of education in years of study.

| Education of deaths<br>over 71 years | NOT-PAIRED | %              | PAIRED    | %              | Total     | %              |
|--------------------------------------|------------|----------------|-----------|----------------|-----------|----------------|
| Illiterate                           | 38         | 50,00%         | 7         | 36,84%         | 45        | 47,37%         |
| 1 - 3                                | 15         | 19,74%         | 5         | 26,32%         | 20        | 21,05%         |
| 4 - 7                                | 9          | 11,84%         | -         | -              | 9         | 9,47%          |
| 8 - 11                               | 2          | 2,63%          | 1         | 5,26%          | 3         | 3,16%          |
| Over 11                              | 2          | 2,63%          | 2         | 10,53%         | 4         | 4,21%          |
| Ignored                              | 8          | 10,53%         | 4         | 21,05%         | 12        | 12,63%         |
| Blank                                | 2          | 2,63%          | -         | -              | 2         | 2,11%          |
| <b>Total</b>                         | <b>76</b>  | <b>100,00%</b> | <b>19</b> | <b>100,00%</b> | <b>95</b> | <b>100,00%</b> |

Supplementary Table S7. Percentage of matching deaths among people with the underlying cause of death as "Malaria as an associated cause" according to level of education in years of study.

| Education level of deaths by<br>"Malaria as an associated cause" | NOT-PAIRED | %              | PAIRED   | %              | Total geral | %              |
|------------------------------------------------------------------|------------|----------------|----------|----------------|-------------|----------------|
| Illiterate                                                       | 12         | 34,29%         | 1        | 11,11%         | 13          | 29,55%         |
| 1 - 3                                                            | 6          | 17,14%         | 1        | 11,11%         | 7           | 15,91%         |
| 4 - 7                                                            | 5          | 14,29%         | 2        | 22,22%         | 7           | 15,91%         |
| 8 - 11                                                           | 6          | 17,14%         | 1        | 11,11%         | 7           | 15,91%         |
| Over 11                                                          | -          | -              | 1        | 11,11%         | 1           | 2,27%          |
| Ignored                                                          | 4          | 11,43%         | 3        | 33,33%         | 7           | 15,91%         |
| Blank                                                            | 2          | 5,71%          |          |                | 2           | 4,55%          |
| <b>Total</b>                                                     | <b>35</b>  | <b>100,00%</b> | <b>9</b> | <b>100,00%</b> | <b>44</b>   | <b>100,00%</b> |
